# Supplementary material
Source: publisher figshare collection journal article supplement (https://tandf.figshare.com/ndownloader/files/15134735)

## Comparative evaluation of metallic skin staples or polypropylene sutures for primary closure of teat wounds in sheep

V Tsioli <sup>a§</sup>, SA Spanos <sup>ab</sup>, D Bikiaris <sup>c</sup>, I Grigoriadou <sup>c</sup>, MS Barbagianni <sup>b</sup>, GC Fthenakis <sup>b</sup>, LG Papazoglou <sup>d</sup>, AI. Sideri <sup>a</sup>, AD Galatos <sup>a</sup>

<sup>a</sup> Department of Surgery, Faculty of Veterinary Medicine, University of Thessaly, 224 Trikalon Street., 43100, Karditsa, Greece

<sup>b</sup> Department of Obstetrics and Reproduction, Faculty of Veterinary Medicine, University of Thessaly, Trikalon 224 st., 43100, Karditsa, Greece

<sup>c</sup> Laboratory of Organic Chemical Technology, Department of Chemistry, Aristotle University of Thessaloniki, University Campus, 54124 Thessaloniki, Greece

<sup>d</sup> Department of Clinical Studies, Companion Animal Clinic, Faculty of Veterinary Medicine, Aristotle University of Thessaloniki, 11 S Voutyra Street, 54627 Thessaloniki, Greece

§ Author for correspondence. Email: [vtioli@vet.uth.gr](mailto:vtioli@vet.uth.gr)

**Supplementary Figure 1. Photograph of the strain gauge tester (1122 Dynamometer; Instron); tissue samples for testing were restrained between the two holding grips; the upper grip was subsequently moved upwards at a speed of 5 mm/minute.**

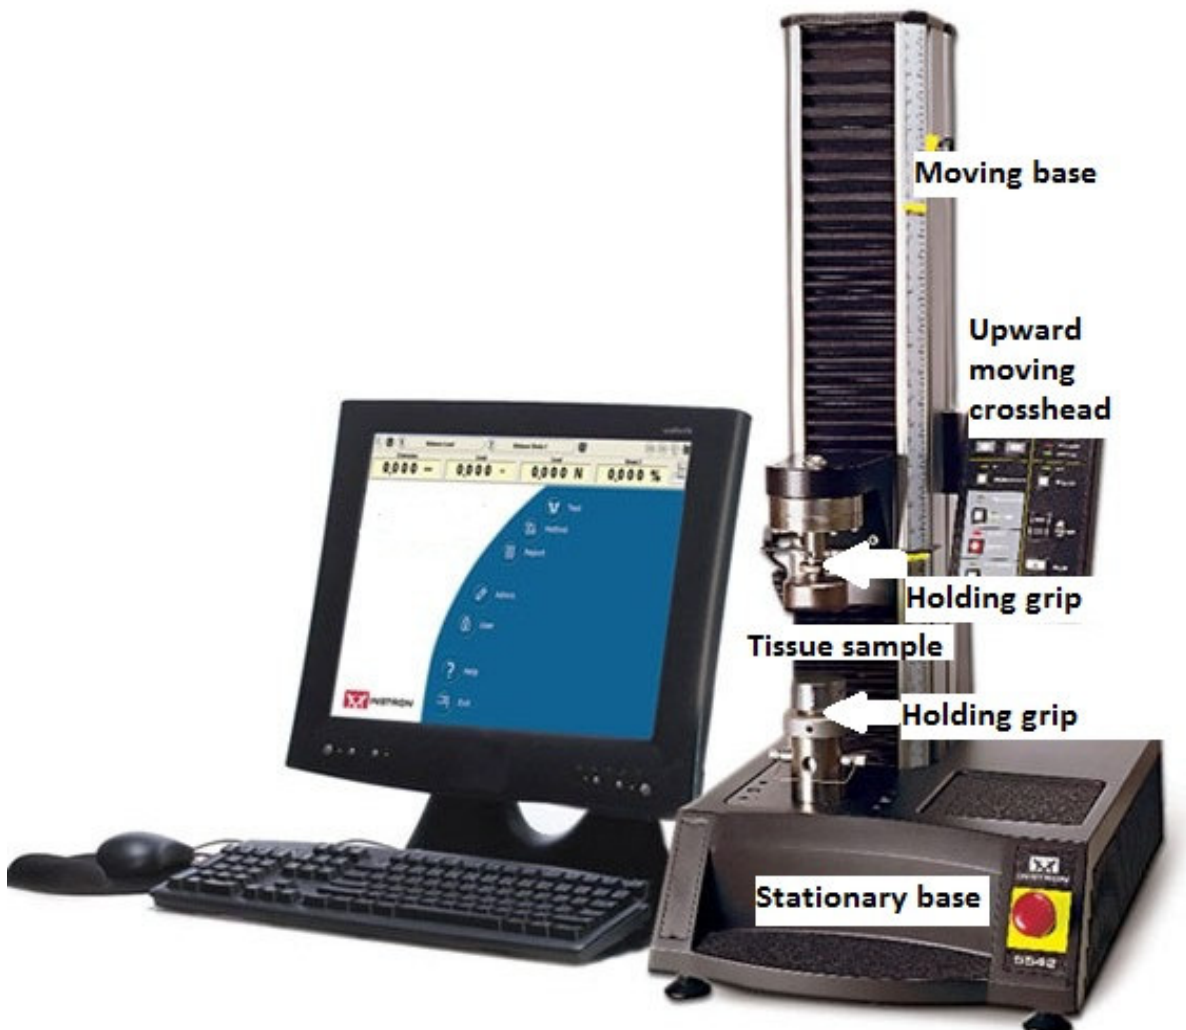

Supplement: Supplementary file 1 [file 15134735]
